# Supplementary material for: Arsenic Removal from Drinking Water: Experiences with Technologies and Constraints in Practice
Source: Atypon-hosted journal article supplement (doi:10.1061/(asce)ee.1943-7870.0001225), 2017-03-16
Supplement: supplemental_data_ee.1943-7870.0001225_hering.pdf [file supplemental_data_ee.1943-7870.0001225_hering.pdf]

## SUPPLEMENTAL DATA

*ASCE Journal of Environmental Engineering*

# Arsenic Removal from Drinking Water: Experiences with Technologies and Constraints in Practice

Janet G. Hering, Ioannis A. Katsoyiannis, Gerardo Ahumada  
Theoduloz, Michael Berg, and Stephan J. Hug

**DOI:** 10.1061/(ASCE)EE.1943-7870.0001225

© ASCE 2017

[www.ascelibrary.org](http://www.ascelibrary.org)

| Location          | Site name                      | study period            | system size |                |                     | comment                                                                                                                   | removal system                                                                                                                      |                            |                        |                                                                                                                                                                                                                                                                                                                                                                                                           | source water quality                              |              |                |           |                  |            |             |          |                       |                |                   |                   |                  | comment | performance                                                                                                               |                  |         | Generation and handling of residuals |                                                                                                                                                       |                                                                                                                                                                                                  |                                                                                                     |
|-------------------|--------------------------------|-------------------------|-------------|----------------|---------------------|---------------------------------------------------------------------------------------------------------------------------|-------------------------------------------------------------------------------------------------------------------------------------|----------------------------|------------------------|-----------------------------------------------------------------------------------------------------------------------------------------------------------------------------------------------------------------------------------------------------------------------------------------------------------------------------------------------------------------------------------------------------------|---------------------------------------------------|--------------|----------------|-----------|------------------|------------|-------------|----------|-----------------------|----------------|-------------------|-------------------|------------------|---------|---------------------------------------------------------------------------------------------------------------------------|------------------|---------|--------------------------------------|-------------------------------------------------------------------------------------------------------------------------------------------------------|--------------------------------------------------------------------------------------------------------------------------------------------------------------------------------------------------|-----------------------------------------------------------------------------------------------------|
|                   |                                |                         | pop. served | av. flow [gpm] | vol. treated [gal.] |                                                                                                                           | type                                                                                                                                | vendor                     | design flow rate [gpm] | comment                                                                                                                                                                                                                                                                                                                                                                                                   | As total soluble [µg/L]                           | As(V) [µg/L] | As(III) [µg/L] | pH (S.U.) | dissolved oxygen | TOC [mg/L] | SiO2 [mg/L] | P [mg/L] | Nitrate (as N) [mg/L] | Sulfate [mg/L] | Fe soluble [µg/L] | Mn soluble [µg/L] | U soluble [µg/L] |         | Sb soluble [µg/L]                                                                                                         | V soluble [µg/L] | Ammonia |                                      | run length [gal] / [BV]                                                                                                                               | backwash (regeneration) frequency [d]                                                                                                                                                            | comment                                                                                             |
|                   |                                |                         |             |                |                     |                                                                                                                           |                                                                                                                                     |                            |                        |                                                                                                                                                                                                                                                                                                                                                                                                           | DEPA Raw Water Data (not available from Battelle) |              |                |           |                  |            |             |          |                       |                |                   |                   |                  |         | run length for initial treatment. The As-MCL was not exceeded anymore after treatment modification (without media change) |                  |         |                                      |                                                                                                                                                       |                                                                                                                                                                                                  |                                                                                                     |
| Felton, DE        | Town of Felton                 | 2006/09/14 - 2007/11/03 | 428         | 263            | 43,446,110          |                                                                                                                           | coagulation/filtration: FM-348-AS, Macrolite media; FeCl3 addition & pre-existing NaOCl injection system (pre- & post-chlorination) | Kinetico                   | 375                    | 14 sampling events with As levels > MCL due to insufficient iron addition or particulate breakthrough from the filters                                                                                                                                                                                                                                                                                    | 30.4                                              | 5.2          | 25.2           | 8.2       | 2.8              | 0.8        | 9.6         | <0.06    | <0.04                 | 9              | <25               | 1.5               | <0.1             | NA      | 0.16                                                                                                                      | 0.32             | NA      | 1.4                                  |                                                                                                                                                       | Backwash wastewater supernatant was recycled back to the head of the treatment system after settling, sludge was pumped to the sewer.                                                            |                                                                                                     |
| Okanogan, WA      | City of Okanogan               | 2008/08/14 - 2009/08/14 | 2500        | 527            | 139,435,000         | only one out of 4 wells (650gpm / 2055gpm) used in study                                                                  | coagulation/filtration: FH13 Electromedia-I; prior NaOCl and FeCl3 addition                                                         | Filtronics                 | 750                    |                                                                                                                                                                                                                                                                                                                                                                                                           | 18.6                                              | 15.6         | 3              | 8         | 1.8              | <0.7       | 24.1        | <0.06    | <0.04                 | 110            | 45                | 70.3              | 0.5              | NA      | 0.3                                                                                                                       | 0.05             | NA      | 0.4                                  |                                                                                                                                                       | Contrary to the Battelle data, As(III) was the predominant species during most of the study period (13.4µg/l on average; As(V) 4.7µg/l). Other water quality data consistent with Battelle data. | Backwash wastewater was reclaimed in a tank. Sludge of backwash solids was discharged to the sewer. |
| Three Forks, MT   | City of Three Forks            | 2006/11/27 - 2008/02/08 | 2000        | 206            | 30,499,000          | only Well 2, which was used for the study, had elevated As levels, Wells 5, 6, 8 and 9 did not.                           | coagulation/filtration: FM-248-AS, Macrolite media; NaOCl and FeCl3 addition                                                        | Kinetico                   | 250                    | As levels > MCL (soluble & particulate) can break through the filters within 2 hr of service time; iron > secondary MCL. Filter performance can not be improved by increasing Fe dosages, the use of an organic polymer nor by smaller media size fraction. Only blending with water from other wells reduces As concentrations < MCL levels                                                              | 63.7                                              | 62.4         | 1.3            | 7.5       | 5.2              | 0.8        | 48.7        | <0.06    | 0.4                   | 18             | <25               | <0.1              | 3.8              | NA      | 8.4                                                                                                                       | <0.05            | NA      | 1.1                                  | Backwash should have been much more frequent to avoid As & Fe breakthrough.                                                                           | Residuals: backwash wastewater and filter-to-waste rinse water. 10% discharged via sewer to a lagoon used for irrigation, 90% reclaimed after being passed through a bag filter                  |                                                                                                     |
| Arnaudville, LA   | Town of Arnaudville            | 2006/07/17 - 2010/09/16 | 1200        | 335            | 363,096,450         |                                                                                                                           | iron removal: FM-284-AS with Macrolite media; KMnO4 addition                                                                        | Kinetico                   | 770                    | The system did not work well overall: several system stops, filter fouling due to unintentional aeration, erratic iron addition 2007/12 - 2009/07. Effluent with elevated As & Fe concentrations.                                                                                                                                                                                                         | 34.5                                              | 0.8          | 33.7           | 7         | 0.6              | 1.8        | 41.7        | <0.06    | <0.04                 | <1.0           | 2072              | 129               | <0.1             | NA      | 0.7                                                                                                                       | 1.9              | NA      | 0.5                                  | unintentional aeration in contact tank: extensive biofouling leading to backwashing >8x/d; backwashing up to 16x/d after iron addition                | wastewater: 5.5% of water production, discharged to building sump, emptied by gravity to a pond                                                                                                  |                                                                                                     |
| Delavan, WI       | Vintage on the Ponds           | 2005/07/12 - 2006/06/03 | 52          | 20*            | 2,500,200           | nursing home facility. *maximal flowrate. An average flow is not given because accurate flowrate data were not attainable | iron removal: PM2162D6 Pressure Filtration System with Macrolite media; prior NaOCl addition; water softening system downstream     | Kinetico                   | 45                     | On-demand system operation made it difficult to adjust chlorine dosing rates - > erratic chlorine residuals. As(III) and Fe(II) were only partially or not oxidized when the chlorine injection system did not work properly and/or due to the presence of chloramines formed by chlorination due to elevated ammonia levels. Additional contact time in the pressure filters enhanced As & Fe oxidation. | 20.5                                              | 1.4          | 19.1           | 7.5       | 1.2              | 1.8        | 14.3        | <0.06    | <0.04                 | <1             | 1400              | 18.3              | <0.1             | NA      | 0.1                                                                                                                       | 2.8              | NA      | 4                                    | 102 backwash cycles during study period                                                                                                               | Backwash wastewater discharged to sanitary sewer line.                                                                                                                                           |                                                                                                     |
| Fountain City, IN | Northeastern Elementary School | 2008/09/22 - 2009/10/29 | 600         | 48             | 941,500             | school                                                                                                                    | iron removal: G2 media; prior NaOCl injection                                                                                       | US Water Systems           | 60                     |                                                                                                                                                                                                                                                                                                                                                                                                           | 18.1                                              | 5.5          | 12.6           | 7.5       | 2.9              | 1.6        | 13.9        | <0.03    | <0.05                 | 2              | 855               | 53.1              | NA               | NA      | <0.1                                                                                                                      | 0.7              | NA      | 50                                   | 8 backwash events during study period                                                                                                                 | Backwash wastewater discharged to the sewer. No G2 media replacement required during study period.                                                                                               |                                                                                                     |
| Sabin, MN         | Sabin                          | 2006/01/30 - 2007/04/29 | 500         | 231            | 14,884,800          | 175 service connections                                                                                                   | iron removal: FM-248-AS, Macrolite media; pre-existing NaOCl injection system (pre- & post-chlorination)                            | Kinetico                   | 250                    | Low rated of manganese removal and accumulation in the distribution system. Increased chlorine dosages for prechlorination enhanced soluble Mn oxidation and removal, but reduced filter run length                                                                                                                                                                                                       | 28.3                                              | 15.9         | 12.4           | 7.3       | 5.9              | 1.8        | 29.7        | <0.1     | <0.04                 | 410            | 990               | 305               | 5.3              | <0.1    | 0.11                                                                                                                      | 0.19             | NA      | 2.3                                  | 1 - 4 backwashes / week                                                                                                                               | Backwash wastewater discharged to building sump, which emptied by gravity to sanitary sewer.                                                                                                     |                                                                                                     |
| Sandusky, MI      | City of Sandusky               | 2006/06/14 - 2007/06/22 | 2916        | 163            | 61,883,000          | one well out of four was used in the study (main supply well)                                                             | iron removal: AERLATER Type II, prechlorination/oxidation (NaOCl)                                                                   | Siemens Water Technologies | 340                    | 2.5mg/L chlorine dosage (as Cl2) was not able to achieve breakpoint chlorination due to ammonia presence. As(III) oxidation partially inhibited (by chloramines). Occasional particulate iron breakthrough.                                                                                                                                                                                               | 22                                                | 9.7          | 12.3           | 7.1       | 0.5              | 1.5        | 13.9        | <0.1     | <0.01                 | 89             | 1244              | 34.5              | 0.6              | NA      | 1.1                                                                                                                       | 0.3              | NA      | 3                                    | backwash frequency 3 times/week until February 2007, then 2 times/week                                                                                | Backwash wastewater discharged to building sump, which emptied to sanitary sewer.                                                                                                                |                                                                                                     |
| Sauk Centre, MN   | Big Sauk Lake Mobile Home Park | 2005/07/13 - 2006/10/01 | 37          | 4              | 2,017,000           | mobile homes                                                                                                              | iron removal: CP-213f, Macrolite media; KMnO4 addition                                                                              | Kinetico                   | 20                     | Particulate As & Fe breakthrough -> more frequent backwashing. Mn passed through the filter (high TOC inhibited formation of filterable Mn solids) -> increase KMnO4 dosage -> elevated Mn concentrations in treated water                                                                                                                                                                                | 20.7                                              | 7.1          | 13.6           | 7.1       | 1.48             | 3.9        | 25          | <0.1     | <0.04                 | <5.0           | 3149              | 154               | <0.1             | NA      | <0.1                                                                                                                      | 1.2              | NA      | 0.4                                  | backwash cycles were increased to as many as 11 per day throughout the study                                                                          | Backwash wastewater and associated solids were discharged to a septic system, then to a sanitary sewer                                                                                           |                                                                                                     |
| Waynesville, IL   | Village of Waynesville         | 2009/07/15 - 2010/09/19 | 450         | 84.4           | 12,603,800          |                                                                                                                           | iron removal: GreensandPlus media; NaMnO4 addition                                                                                  | Peerless                   | 96                     | incomplete iron oxidation in 3 of 13 sampling events (147µg/l) and presence of "soluble" manganese (756µg/l on av.) in NaMnO4-treated water.                                                                                                                                                                                                                                                              | 31.5                                              | 3.3          | 22.6           | 7.1       | 1.3              | 9          | 20.1        | 0.17     | <0.05                 | <1             | 1456              | 19                | NA               | <0.1    | 0.2                                                                                                                       | 3.6              | NA      | 3                                    | backwash and rinse wastewater, discharged to a sump emptying into two septic tanks in series, then to the sanitary sewer system. Sludge was disposed. |                                                                                                                                                                                                  |                                                                                                     |

| Location          | Site name                                                | study period            | system size |                |                     |                                                                                                                  | removal system                                                                                                                                                                                   |                               |                        |                                                                                                                                                                                                                                                                                                                                                                       |                         | source water quality |                |           |                  |            |             |          |                       |                |                   | comment | performance       |                  |                   | Generation and handling of residuals |                                                          |                           |                                                                                                                                                                                 |                                                                                                                                                                                                 |                                                                                                                                 |
|-------------------|----------------------------------------------------------|-------------------------|-------------|----------------|---------------------|------------------------------------------------------------------------------------------------------------------|--------------------------------------------------------------------------------------------------------------------------------------------------------------------------------------------------|-------------------------------|------------------------|-----------------------------------------------------------------------------------------------------------------------------------------------------------------------------------------------------------------------------------------------------------------------------------------------------------------------------------------------------------------------|-------------------------|----------------------|----------------|-----------|------------------|------------|-------------|----------|-----------------------|----------------|-------------------|---------|-------------------|------------------|-------------------|--------------------------------------|----------------------------------------------------------|---------------------------|---------------------------------------------------------------------------------------------------------------------------------------------------------------------------------|-------------------------------------------------------------------------------------------------------------------------------------------------------------------------------------------------|---------------------------------------------------------------------------------------------------------------------------------|
|                   |                                                          |                         | pop. served | av. flow [gpm] | vol. treated [gal.] | comment                                                                                                          | type                                                                                                                                                                                             | vendor                        | design flow rate [gpm] | comment                                                                                                                                                                                                                                                                                                                                                               | As total soluble [µg/L] | As(V) [µg/L]         | As(III) [µg/L] | pH (S.U.) | dissolved oxygen | TOC [mg/L] | SiO2 [mg/L] | P [mg/L] | Nitrate (as N) [mg/L] | Sulfate [mg/L] | Fe soluble [µg/L] |         | Mn soluble [µg/L] | U soluble [µg/L] | Sb soluble [µg/L] |                                      | V soluble [µg/L]                                         | Ammonia                   | run length [gal] / [BV]                                                                                                                                                         | backwash (regeneration) frequency [d]                                                                                                                                                           | comment                                                                                                                         |
| Climax, MN        | Climax                                                   | 2004/08/11 - 2005/08/12 | 264         | 122 / 142      | 13,829,000          | average flow rate varied depending on which of the two wells was operational                                     | iron removal with iron addition: FM-236-AS, Macrolite media; NaOCl addition. FeCl3 addition starting in January 2005                                                                             | Kinetico                      | 140                    | As levels in treated water 14.1µg/L -> supplemental iron addition from January 2005 on -> As levels below MCL                                                                                                                                                                                                                                                         | 34.6                    | <0.1                 | 34.8           | 7.4       | NA               | <1.0       | 27.3        | <0.10    | NA                    | 120            | 540               | 130     | NA                | <0.1             | 0.4               | 0.7                                  | NA                                                       | 1.9                       | backwash settings were slightly modified after 5 months leading to water savings. Media was not replaced.                                                                       | Backwash wastewater was discharged to an underground sump and pumped to a sanitary sewer line for disposal                                                                                      |                                                                                                                                 |
| Conneaut Lake, PA | Conneaut Lake Park                                       | 2009/12/03 - 2010/12/17 | 250         | 153            | 20,114,000          | Seasonal resort                                                                                                  | iron removal with iron addition: AD-GS+ (Greensand Plus) media; NaOCl injection and FeCl3 addition before filtration                                                                             | AdEdge Technologies           | 250                    | Due to high pressure by the pump, the anticipated flowrate was reduced to 190gpm. Good As removal, but Fe leaking (64µg/L in average effluent)                                                                                                                                                                                                                        | 28                      | 2.2                  | 25.8           | 8         | 3.1              | <1.0       | 12.7        | <0.03    | <0.05                 | 21             | 151               | 66.3    | NA                | <0.1             | 0.2               | 0.14                                 | 83,000 / NA                                              | 1.08                      | Run length per vessel. Backwash frequency of the filter 26hrs; less frequent washing due to daily system run time <12hrs (backwash every 2-3d)                                  | Backwash wastewater discharged into holding tanks. Supernatant was recycled to the header of the filtration skid after >4hrs settling, the sludge was discharged to a sewer.                    |                                                                                                                                 |
| Pentwater, MI     | Village of Pentwater                                     | 2005/11/22 - 2006/12/08 | 1000        | 350            | 39,185,000          | population increasing during the summer months; one out of 3 wells used in the study (primary well)              | iron removal with iron addition: FM-260-AS, Macrolite media; pre-existing NaOCl addition; FeCl3 addition after June 2006.                                                                        | Kinetico                      | 400                    | incomplete As(III) oxidation (due to chloramines). Consistent As removal to <10g µg/l only achieved with supplemental iron addition.                                                                                                                                                                                                                                  | 13.2                    | 2.1                  | 11.1           | 6.9       | 1.3              | 2.5        | 11.1        | <0.1     | <0.04                 | 1              | 465               | 32.6    | <0.1              | NA               | 1                 | 0.3                                  | NA                                                       | 2.3                       | backwash 3 times a week.                                                                                                                                                        | Backwash wastewater discharged to building sump, which emptied by gravity to sanitary sewer.                                                                                                    |                                                                                                                                 |
| Goshen, IN        | Clinton Christian School                                 | 2008/06/06 - 2009/06/19 | 142         | 16.2           | 517,174             | school                                                                                                           | iron removal & adsorptive media: AD26 (oxidation / filtration) & E33 (adsorption); prior NaOCl injection                                                                                         | AdEdge Technologies           | 25                     | The majority of (particulate) As was filtered out by AD26 media. Operational issue: maintaining target level of free chlorine residuals difficult                                                                                                                                                                                                                     | 26.3                    | 11.6                 | 14.7           | 7.4       | NA               | <1.0       | 18.1        | <0.03    | <0.05                 | 2              | 758               | 97.4    | NA                | NA               | <0.1              | 0.2                                  | NA / 123,763 (AD26); NA / 81,055 (E33)                   | 3 (AD26) / 39 - 44 (AD33) | run lengths projected based on throughput                                                                                                                                       | Backwash wastewater discharged to Rock Run Creek, spent bag filters went into municipal trash. E33 media would be disposed at a sanitary landfill (no replacement required during study period) |                                                                                                                                 |
| Springfield, OH   | Chateau Estates Mobile Home Park                         | 2005/09/21 - 2006/09/24 | 600         | 37             | 16,873,000          | 226 connections for a population of 600. average flows: AD-33: 37gpm; AD-26: 90 - 130gpm (two alternating wells) | iron removal & adsorptive media: AD26 (oxidation / filtration); Fe & Mn removal) & AD33 (adsorption); pre-existing NaOCl & polyphosphate addition (prior to AD26)                                | AdEdge Technologies           | 250                    | Operational issue: chlorine injection system failed to control chlorine residuals (4mg/L instead of 1mg/L). An inline filter placed before the chlorine monitor seemed to resolve the problem.                                                                                                                                                                        | 16.6                    | 1.4                  | 15.4           | 7.3       | 2.1              | <1.0       | 18.5        | <0.10    | <0.04                 | 21             | 1010              | 37.4    | 1.2               | 0.3              | 0.24              | 0.21                                 | NA                                                       | NA / 2.5                  | AD-33 system: 4 backwash cycles during study period (not required, as the pressure loss was insignificant). AD-26 system: backwashed every 2 to 3 days. Media was not replaced. | Backwash wastewater was discharged to the sewer.                                                                                                                                                |                                                                                                                                 |
| Stewart, MN       | Stewart                                                  | 2006/02/02 - 2007/02/28 | 600         | 188; 166       | 20,441,000          | av. flow AERALATER: 188gpm, APU-300: 176gpm                                                                      | iron removal & adsorptive media: Type II AERALATER for iron removal pretreatment; APU-300 system with AD33 adsorptive media; post-chlorination (NaMnO4), fluoridation and polyphosphate addition | Siemens & AdEdge Technologies | 250                    | First week of operation: NaMnO4 addition to oxidize As(III) to As(V). NaMnO4 addition (inadvertently) discontinued due to elevated manganese levels and microbial-mediated As(III) oxidation (As removal efficiency of gravity filter reduced from 60% to 34%). Short AD-33 media run lengths due to competition from elevated P and biofouling in adsorption vessels | 32.9                    | 1                    | 31.9           | 7.7       | 2.2              | 7.2        | 26.6        | <0.1     | <0.04                 | <5             | 1359              | 28      | <0.1              | NA               | <0.1              | 1.7                                  | Source Water data from Well No. 3 (one of the two wells) | NA / 25,300               | 90                                                                                                                                                                              | AERALATER backwash: once a week; APU-300 backwash 4 times a year                                                                                                                                | Wastewater discharged to building sump, which emptied by gravity to two holding tanks before being pumped to the sanitary sewer |
| Willard, UT       | Hot Springs Mobile Home Park (HSMHP)                     | 2008/12/11 - 2010/10/18 | 117         | 7.3            | 5,629,000           | 110 to 125 residents                                                                                             | iron removal & adsorptive media: Adsorbia GTO; Birn/Filox oxidizing media.                                                                                                                       | Filter Tech                   | 30                     |                                                                                                                                                                                                                                                                                                                                                                       | 13.6                    | 7.6                  | 6              | 7.5       | 2.3              | <1         | 13.3        | NA       | 0.2                   | 6              | 129               | 165     | NA                | <0.1             | 4.3               | 0.05                                 | NA                                                       | NA / 1                    | pre-oxidation vessel backwashed daily. Adsorbia GTO adsorptive media did not require backwash                                                                                   | Backwash wastewater discharged to a septic tank                                                                                                                                                 |                                                                                                                                 |
| Alvin, TX         | Oak Manor Municipal Utility District                     | 2006/04/25 - 2008/04/08 | 189         | 129            | 35,358,250          |                                                                                                                  | adsorptive media: APU-30S system, Sorb 33 media; pre-existing chlorination system                                                                                                                | Severn Trent Services (STS)   | 150                    |                                                                                                                                                                                                                                                                                                                                                                       | 19                      | 1.4                  | 17.6           | 7.8       | 1.7              | 0.7        | 16          | <0.05    | <0.05                 | 1              | 37                | 61.7    | 1.5               | NA               | 1.9               | 0.2                                  | 26,638,090 / 28,736                                      | 30                        | Run length of the lag vessel (lead vessel: 9,527,220 gal / 10,227 BV). Progressively less effective backwash observed after 1 year.                                             | Backwash wastewater was discharged into a small ditch and subsequently drained into a roadside ditch.                                                                                           |                                                                                                                                 |
| Anthony, NM       | Desert Sands Mutual Domestic Water Consumers Association | 2004/01/16 - 2005/07/14 | 1886        | 271            | 52,645,000          |                                                                                                                  | adsorptive media: SORB 33-5 (granular form); APU-300 system. pre-chlorination                                                                                                                    | Severn Trent Services (STS)   | 320                    | 45% media loss (disintegration of the granular media during the run). Throughput between backwash events decreased from 3680 BV to 630 BV for each of the two vessels                                                                                                                                                                                                 | 22.3                    | 0.7                  | 21.6           | 7.7       | NA               | 1.6        | 35.1        | 0.1      | NA                    | 190            | <30               | 9       | NA                | <0.1             | 0.5               | NA                                   | NA / 40,600                                              | 7                         |                                                                                                                                                                                 |                                                                                                                                                                                                 |                                                                                                                                 |
| Anthony, NM       | Desert Sands Mutual Domestic Water Consumers Association | 2005/07/29 - 2006/08/16 | 1886        | 251            | 46,553,000          |                                                                                                                  | adsorptive media: SORB 33-p (pelletized form); APU-300 system. pre-chlorination (NaOCl)                                                                                                          | Severn Trent Services (STS)   | 320                    | 12% media loss                                                                                                                                                                                                                                                                                                                                                        | 22.3                    | 0.7                  | 21.6           | 7.7       | NA               | 1.6        | 35.1        | 0.1      | NA                    | 190            | <30               | 9       | NA                | <0.1             | 0.5               | NA                                   | NA / 49,500                                              | 7                         |                                                                                                                                                                                 | Backwash wastewater discharged to an evaporation pond, spent media could be disposed of in a sanitary landfill.                                                                                 |                                                                                                                                 |
| Bow, NH           | White Rock Water Company (WRWC)                          | 2004/10/13 - 2006/09/26 | 96          | 40             | 13,115,925          | 96 homes served. Study period divided into 3 runs with similar outcomes                                          | adsorptive media: G2; pre-existing NaOCl and NaOH addition; pH lowered by H2SO4 before treatment, raised with NaOH afterwards                                                                    | ADI International Inc.        | 40                     | G2 media not effective in removing As < 10µg/L. As, Mn, and silica can be leached from the media. Changing pH conditions can cause changes in lead & copper concentrations in the distribution system.                                                                                                                                                                | 44.1                    | 43.6                 | 0.5            | 6.8       | NA               | <0.7       | 19.7        | <0.10    | NA                    | 12             | <25               | 1.5     | NA                | 0.7              | 0.6               | NA                                   | NA / 3000                                                | NA                        | No backwash required (system backwashed only 3 times during the demonstration study)                                                                                            | Spent media was disposed of in a non-hazardous waste landfill. Backwash wastewater was discharged to a rip-rap lined surface drainage and allowed to infiltrate into the ground.                |                                                                                                                                 |

| Location                              | Site name                                      | study period            | system size |                |                     |                                                                                           | removal system                                                                                                                              |                                                  |                        |                                                                                                                                                                                                                |                         | source water quality |                |           |                  |            |             |          |                       |                |                   |                   |                  |                   | comment | performance      |                     |                         | Generation and handling of residuals                                                                                                                                                                                                |                                                                                                                                                                                                    |
|---------------------------------------|------------------------------------------------|-------------------------|-------------|----------------|---------------------|-------------------------------------------------------------------------------------------|---------------------------------------------------------------------------------------------------------------------------------------------|--------------------------------------------------|------------------------|----------------------------------------------------------------------------------------------------------------------------------------------------------------------------------------------------------------|-------------------------|----------------------|----------------|-----------|------------------|------------|-------------|----------|-----------------------|----------------|-------------------|-------------------|------------------|-------------------|---------|------------------|---------------------|-------------------------|-------------------------------------------------------------------------------------------------------------------------------------------------------------------------------------------------------------------------------------|----------------------------------------------------------------------------------------------------------------------------------------------------------------------------------------------------|
|                                       |                                                |                         | pop. served | av. flow [gpm] | vol. treated [gal.] | comment                                                                                   | type                                                                                                                                        | vendor                                           | design flow rate [gpm] | comment                                                                                                                                                                                                        | As total soluble [µg/L] | As(V) [µg/L]         | As(III) [µg/L] | pH (S.U.) | dissolved oxygen | TOC [mg/L] | SiO2 [mg/L] | P [mg/L] | Nitrate (as N) [mg/L] | Sulfate [mg/L] | Fe soluble [µg/L] | Mn soluble [µg/L] | U soluble [µg/L] | Sb soluble [µg/L] |         | V soluble [µg/L] | Ammonia             | run length [gal] / [BV] |                                                                                                                                                                                                                                     | backwash (regeneration) frequency [d]                                                                                                                                                              |
| Brown City, MI                        | Brown City                                     | 2004/05/11 - 2007/05/02 | 1334        | 564            | 154,000,000         | 1334 community members (664 service connections)                                          | adsorptive media: SORB 33 (granular form); APU-300 system. pre-existing post-chlorination, pre-chlorination (NaOCl) implemented in May 2005 | Severn Trent Services (STS)                      | 640                    | Throughput between consecutive backwash events decreased with prechlorination (3000BV to 150BV). Prechlorination: As removal improved significantly                                                            | 12                      | 2.5                  | 9.6            | 7.3       | NA               | <0.50      | 8.1         | <0.10    | NA                    | 74             | 133               | 15.7              | NA               | <0.1              | <0.1    | NA               | NA / 20,800         | 10                      | run length without pre-chlorination (total As-breakthrough). As-conc. remained <10µg/l after the implementation of pre-chlorination. Backwash frequency was lower without pre-chlorination (every 41 days). Media was not replaced. | Backwash wastewater discharged to a drainage ditch.                                                                                                                                                |
| Bruni, TX                             | Webb Consolidated Independent School District  | 2005/12/08 - 2008/05/15 | 230         | 40.2           | 8,841,000           | school                                                                                    | adsorptive media: AD-33; pre-existing NaOCl addition system & pH adjustment / control system (CO2) upstream                                 | AdEdge Technologies                              | 40                     | Operational issues with pH adjustment system and adsorption vessel flow meters/totalizers                                                                                                                      | 55.2                    | 19.6                 | 35.6           | 8         | 1.5              | 0.9        | 42.3        | <0.06    | <0.04                 | 98             | <25               | 4.3               | 10.2             | NA                | 4.4     | <0.05            | NA                  | NA                      | no As breakthrough during the study                                                                                                                                                                                                 | No backwash required during the study period                                                                                                                                                       |
| Buckeye Lake, OH                      | LEADS Head Start Building                      | 2006/06/28 - 2010/02/24 | 60          | <2             | 303,200             | school                                                                                    | adsorptive media: ARM 200; prior NaOCl injection                                                                                            | Kinetico                                         | 10                     | Elevated total trihalomethanes and aloacetic acids in effluent after system startup. Probable causes: chlorine and elevated TOC in AM influent.                                                                | 14.5                    | 2.4                  | 12.1           | 7.6       | NA               | 2          | NA          | NA       | <0.1                  | 24             | 1241              | 80.3              | NA               | NA                | NA      | 0.9              | NA                  | 180                     | only one backwash in study period (after 6 months)                                                                                                                                                                                  | Backwash wastewater discharged to the sewer. No media replacement required during study period.                                                                                                    |
| Dummerston, VT                        | Charette Mobile Home Park                      | 2005/06/24 - 2006/10/10 | 14          | 6.1            | 745,000             | mobile homes                                                                              | adsorptive media: A/ Complex 2000; preexisting NaOCl addition                                                                               | Aquatic Treatment Systems (ATS)                  | 22                     | aluminium leached from the adsorptive media (decreasing trend). As breakthrough occurred sooner than expected presumably due to high pH, competing anions (silica), and higher-than-expected As concentrations | 30.1                    | 28.6                 | 1.5            | 7.9       | 6.1              | <0.7       | 12.3        | <0.06    | 0.24                  | 20             | <25               | 4.2               | 2                | NA                | 0.6     | <0.05            | NA / 16750          | NA                      | run length per train following the final columns (5600 BV if considering the three columns in each train as one large column). No backwash required for system operation.                                                           | Only spent media as residual (not specified how it was discharged)                                                                                                                                 |
| Geneseo Hills, IL                     | Geneseo Hills Subdivision                      | 2008/05/08 - 2010/07/30 | 480         | 32             | 33,158,263          |                                                                                           | adsorptive media: AD-33; pre-existing chlorine addition system upstream                                                                     | AdEdge Technologies                              | 200                    | av. flow = on-demand flowrates; peak-flowrate: 156gpm. Average residence time: 11hr -> 8.2lb solids (incl. arsenic laden iron particles ) settled in the hydropneumatic tanks in 3915gal ww                    | 19.6                    | 2.1                  | 17.5           | 7.1       | 1.5              | 1.8        | 20.3        | 0.1      | <0.05                 | <1.0           | 227               | 8.3               | NA               | <0.1              | <0.1    | 1.2              | NA                  | 45                      | operational issue: bag filter assembly upstream of the backwash holding tank -> clogging during backwashing                                                                                                                         | Wastewater discharged to a backwash holding tank (much solids, mainly iron). Supernatant recycled upstream of the chlorine addition point; sludge accumulated & transferred to sludge holding tank |
| Goffstown, NH                         | Orchard Highlands Subdivision                  | 2005/04/15 - 2006/08/06 | 42          | 13             | 2,085,000           | homes                                                                                     | adsorptive media: AD-33; pre-existing aeration for radon removal                                                                            | AdEdge Technologies                              | 10                     | Unexpectedly short run length for As probably due to shorter EBCT and competing anions (phosphorus).                                                                                                           | 33.1                    | 32.3                 | 0.8            | 6.9       | 5.1              | <0.7       | 25.7        | 0.2      | <0.04                 | 5.8            | 5.8               | 2.8               | 2.4              | NA                | 0.4     | 0.05             | NA / 25,710         | NA                      | Run length of the lag vessel (lead vessel: 19,500 BV). No backwash required (system backwashed twice in total)                                                                                                                      | Spent media disposed of at a sanitary landfill, backwash wastewater was discharged to an on-site surface drainage field                                                                            |
| Goffstown, NH                         | Orchard Highlands Subdivision                  | 2006/09/06 - 2007/08/06 | 42          | 13             | 1,374,000           | homes                                                                                     | adsorptive media: AD-33; pre-existing aeration for radon removal                                                                            | AdEdge Technologies                              | 10                     | Lead vessel rebedded and switched to lag position. short run length: see reasons for Run1 + the lead vessel containing partially used media.                                                                   | 33.1                    | 32.3                 | 0.8            | 6.9       | 5.1              | <0.7       | 25.7        | 0.2      | <0.04                 | 5.8            | 5.8               | 2.8               | 2.4              | NA                | 0.4     | 0.05             | 1,374,000 / 18,370  | NA                      | No backwash required (system backwashed twice in total)                                                                                                                                                                             | Spent media disposed of at a sanitary landfill, backwash wastewater was discharged to an on-site surface drainage field                                                                            |
| Stevensville, Queen Anne's County, MD | Grasonville, Queen Anne's County, Prospect Bay | 2004/06/30 - 2007/04/02 | 300         | 207            | 71,533,000          | 300 connections; only one of two wells (operation alternating daily) chosen for the study | adsorptive media: SORB 33; APU-300 system. pre-chlorination (implemented in November 2004)                                                  | Severn Trent Services (STS)                      | 300                    | First months: post-chlorination. Prechlorination: As removal improved significantly                                                                                                                            | 18.7                    | 0.3                  | 18.4           | 7.3       | NA               | NA         | 14.1        | <0.1     | NA                    | 4.3            | 254               | 1.4               | NA               | <0.1              | <0.1    | NA               | NA / 7400           | 20                      | run length with post-chlorination (As(III)-breakthrough). As-conc. remained <10µg/l after the implementation of pre-chlorination. Media was not replaced.                                                                           | Backwash wastewater discharged to a tanker truck and transported to a WWTP for disposal.                                                                                                           |
| Lead, SD                              | Terry Trojan Water District                    | 2008/04/04 - 2009/11/29 | 187         | 71.5           | 27,978,780          | community water system incl. 10 commercial service connections                            | adsorptive media: ArsenXnp; post-chlorination with pre-existing system                                                                      | SolmeteX                                         | 75                     |                                                                                                                                                                                                                | 23                      | 22.5                 | 0.5            | 7.3       | NA               | <1         | 15          | <0.01    | 0.5                   | 2              | <25               | 0.8               | NA               | 0.3               | 0.7     | <0.05            | 14,725,250 / 70,310 | NA                      | no backwash needed for the media                                                                                                                                                                                                    | spent media given back to the vendor                                                                                                                                                               |
| Lead, SD                              | Terry Trojan Water District                    | 2009/11/30 - 2010/05/23 | 187         | 69.2           | 7,231,940           | commercial service connections                                                            | adsorptive media: ArsenXnp & LayneRT; post-chlorination with pre-existing system                                                            | SolmeteX                                         | 75                     | System rebedded with LayneRT medium in lag position; lead vessel containing partially exhausted ArsenXnp                                                                                                       | 23                      | 22.5                 | 0.5            | 7.3       | NA               | <1         | 15          | <0.01    | 0.5                   | 2              | <25               | 0.8               | NA               | 0.3               | 0.7     | <0.05            | NA                  | NA                      | no backwash needed for the media                                                                                                                                                                                                    |                                                                                                                                                                                                    |
| Nambe Pueblo, NM                      | Nambe Pueblo                                   | 2007/05/15 - 2009/09/28 | 500         | 114            | 64,580,000          | 150 service connections                                                                   | adsorptive media: AD-33; pre-existing chlorine addition system & pH adjustment / control system (CO2) upstream                              | AdEdge Technologies                              | 160                    | 3 - 4 incidences of elevated As & U levels (higher than source concentrations) due to losses of pH control (adsorbed As & U "flushed" out of the media beds)                                                   | 31.4                    | 31.2                 | 0.2            | 8.5       | NA               | 2.1        | 14.1        | <0.10    | 0.6                   | 28             | <30               | 1.3               | 32.9             | <0.1              | 8.6     | NA               | NA                  | NA                      | Neither backwash nor media replacement was required during the study period                                                                                                                                                         |                                                                                                                                                                                                    |
| Pomfret, CT                           | Seely-Brown Village                            | 2009/02/04 - 2009/12/02 | 48          | 9.8            | 581,200             | nursing home facility                                                                     | adsorptive media: ArsenXnp                                                                                                                  | SolmeteX (acquired by Layne Christensen Company) | 15                     | instead of replacing spent ArsenXnp media, the vendor recommended replacing it by a new medium, LayneRT                                                                                                        | 25.2                    | 23.2                 | 2              | 7.3       | 2.3              | <1.0       | 13.4        | 0.49     | 0.06                  | 18.5           | <25               | 7.2               | NA               | <0.1              | 0.4     | <0.05            | NA / 15,000         | NA                      | No backwash required during the performance evaluation study                                                                                                                                                                        | Spent filters disposed of with landfill trash, spent media regenerated with other spent media and used in non-drinking water applications.                                                         |
| Pomfret, CT                           | Seely-Brown Village                            | 2009/12/03 - 2010/09/24 | 48          | 10             | 606,600             | nursing home facility                                                                     | adsorptive media: LayneRT                                                                                                                   | SolmeteX (acquired by Layne Christensen Company) | 15                     |                                                                                                                                                                                                                | 25.2                    | 23.2                 | 2              | 7.3       | 2.3              | <1.0       | 13.4        | 0.49     | 0.06                  | 18.5           | <25               | 7.2               | NA               | <0.1              | 0.4     | <0.05            | NA / 18,000         | NA                      | No backwash required during the performance evaluation study                                                                                                                                                                        | Spent filters disposed of with landfill trash, spent media regenerated with other spent media and used in non-drinking water applications.                                                         |

| Location                  | Site name                     | study period                                     | system size |                |                     |                                                                                                                              | removal system                                                                                                                                   |                                 |                        |                                                                                                                                                                                                                                                                    |                         | source water quality |                |           |                  |            |             |          |                       |                |                   |                   |                  |                   | comment | performance      |                      |                         | Generation and handling of residuals                                                                                                                                                      |                                                                                                                             |                                                                                                                                                                                                        |
|---------------------------|-------------------------------|--------------------------------------------------|-------------|----------------|---------------------|------------------------------------------------------------------------------------------------------------------------------|--------------------------------------------------------------------------------------------------------------------------------------------------|---------------------------------|------------------------|--------------------------------------------------------------------------------------------------------------------------------------------------------------------------------------------------------------------------------------------------------------------|-------------------------|----------------------|----------------|-----------|------------------|------------|-------------|----------|-----------------------|----------------|-------------------|-------------------|------------------|-------------------|---------|------------------|----------------------|-------------------------|-------------------------------------------------------------------------------------------------------------------------------------------------------------------------------------------|-----------------------------------------------------------------------------------------------------------------------------|--------------------------------------------------------------------------------------------------------------------------------------------------------------------------------------------------------|
|                           |                               |                                                  | pop. served | av. flow [gpm] | vol. treated [gal.] | comment                                                                                                                      | type                                                                                                                                             | vendor                          | design flow rate [gpm] | comment                                                                                                                                                                                                                                                            | As total soluble [µg/L] | As(V) [µg/L]         | As(III) [µg/L] | pH (S.U.) | dissolved oxygen | TOC [mg/L] | SiO2 [mg/L] | P [mg/L] | Nitrate (as N) [mg/L] | Sulfate [mg/L] | Fe soluble [µg/L] | Mn soluble [µg/L] | U soluble [µg/L] | Sb soluble [µg/L] |         | V soluble [µg/L] | Ammonia              | run length [gal] / [BV] |                                                                                                                                                                                           | backwash (regeneration) frequency [d]                                                                                       | comment                                                                                                                                                                                                |
| Rimrock, AZ               | Arizona Water Company         | 2004/06/24 - 2006/08/30; 2006/11/27 - 2007/03/28 | 2556        | 30             | 22,143,000          | only one well out of six was used for the study (main supply well: 315gpm)                                                   | adsorptive media: AD-33; APU-100 system; prior NaOCl addition                                                                                    | AdEdge Technologies             | 45                     | Media changeout in November 2006 after reaching 10µg/l As breakthrough in August 2006. Water in the distribution system had higher As levels (19.3µg/l) due to blending with untreated water from other wells.                                                     | 64.8                    | 64.8                 | <0.10          | 7.1       | NA               | 3.4        | 24.8        | <0.10    | NA                    | 9.5            | <25               | 8.1               | NA               | NA                | NA      | NA               | NA                   | 17,164,000 / 52,150     | 60                                                                                                                                                                                        | run length: As breakthrough before media rebedding. Backwash frequency: 30 days in first year, prolonged to quarterly later | Backwash wastewater recycled by blending the recycle tank supernatant with influent water and removing solids by a bag filter. Spent media could be disposed of at a sanitary landfill (non-hazardous) |
| Rollinsford, NH           | Rollinsford                   | 2004/02/09 - 2004/10/27                          | 450         | 95             | 11,926,000          | average flow with both wells operating. One well operating: 60gpm                                                            | adsorptive media: AD-33; APU-100 system; pre-existing chlorine addition system & pH adjustment system (CO2) upstream                             | AdEdge Technologies             | 100                    | higher than normal system Δp and inlet pressure -> frequent backwashes -> high media loss. pH control system: mechanical problems -> consistent reduction of pH to target value 7.0 failed                                                                         | 33.9                    | 13.9                 | 20.1           | 7.4       | NA               | <1.0       | 13.6        | <0.10    | NA                    | 36             | <30               | 68.6              | NA               | <0.1              | <0.1    | NA               | NA / 12,500 - 17,000 | 8                       | Backwash frequency = average number of operating days between backwashes. Media replaced by end of this phase (39 - 53% media loss)                                                       | backwash wastewater discharged to on-site subsurface infiltration area; spent media disposed of at a sanitary landfill      |                                                                                                                                                                                                        |
| Rollinsford, NH           | Rollinsford                   | 2004/11/03 - 2005/01/15                          | 450         | 112            | 3,921,000           | average flow with both wells operating.                                                                                      | adsorptive media: AD-33; APU-100 system; pre-existing chlorine addition system & pH adjustment system (CO2) upstream                             | AdEdge Technologies             | 100                    | higher than normal system Δp and inlet pressure -> frequent backwashes -> high media loss. pH control system: mechanical problems -> consistent reduction of pH to target value 7.0 failed                                                                         | 33.9                    | 13.9                 | 20.1           | 7.4       | NA               | <1.0       | 13.6        | <0.10    | NA                    | 36             | <30               | 68.6              | NA               | <0.1              | <0.1    | NA               | NA / 12,500 - 17,000 | 4                       | Backwash frequency = average number of operating days between backwashes.                                                                                                                 | backwash wastewater discharged to on-site subsurface infiltration area; spent media disposed of at a sanitary landfill      |                                                                                                                                                                                                        |
| Rollinsford, NH           | Rollinsford                   | 2005/06/13 - 2006/05/08                          | 450         | 97             | 12,881,000          | average flow with both wells operating. One well operating: 58gpm                                                            | adsorptive media: AD-33; APU-RWS system; pre-existing chlorine addition system                                                                   | AdEdge Technologies             | 120                    | valve tree instead of controller valves solved the elevated Δp and inlet pressure problem. pH control system: mechanical problems -> consistent reduction of pH to target value 7.0 failed                                                                         | 33.9                    | 13.9                 | 20.1           | 7.4       | NA               | <1.0       | 13.6        | <0.10    | NA                    | 36             | <30               | 68.6              | NA               | <0.1              | <0.1    | NA               | NA / 12,500 - 17,000 | 36                      | Backwash frequency = average number of operating days between backwashes.                                                                                                                 | backwash wastewater discharged to on-site subsurface infiltration area; spent media disposed of at a sanitary landfill      |                                                                                                                                                                                                        |
| Susanville, CA            | Richmond Elementary School    | 2005/09/07 - 2007/06/13                          | 250         | 9.3            | 303,000             | school                                                                                                                       | adsorptive media: A/I Complex 2000; A/P Complex 2002 oxidative media                                                                             | Aquatic Treatment Systems (ATS) | 12                     | Iodine (IO4-) and aluminium leached from the oxidizing and adsorptive media (iodine: decreasing trend; Al leaching continuously, but below secondary drinking water standard)                                                                                      | 36.6                    | 4.7                  | 31.9           | 7.5       | 1                | 1          | 14.5        | <0.06    | 0.1                   | 17             | <25               | 5.5               | 0.8              | NA                | 0.2     | <0.05            | NA / 5200            | NA                      | Run length considering the three adsorptive columns as one large column. No backwash required during the study period. Adsorptive media was replaced after 18 months of system operations | Spent media could have been disposed of in a sanitary landfill (non-hazardous), but was recycled by the vendor              |                                                                                                                                                                                                        |
| Taos, NM                  | Town of Taos                  | 2006/02/14 - 2007/10/23                          | 5000        | 503            | 22,977,000          | 5000 residences plus summer tourists. the treated supply well contributed only 10% to the 1,000,000 gal water tower capacity | adsorptive media: SORB 33; CO2 pH control system, post-chlorination                                                                              | Severn Trent Services (STS)     | 450                    | Frequent and prolonged system downtime caused by non-system related issues (power outages).                                                                                                                                                                        | 13.9                    | 11.8                 | 2.1            | 9.5       | 0.7              | <0.7       | 30.4        | <0.06    | <0.04                 | 41             | <25               | 0.3               | 0.4              | NA                | 34.2    | <0.05            | NA                   | NA                      | Neither media replacement no backwash required during the study (system backwashed five times for the study purpose)                                                                      | Backwash wastewater discharged to an evaporative pond.                                                                      |                                                                                                                                                                                                        |
| Tohono O'odham Nation, AZ | Covered Wells                 | 2008/02/13 - 2010/03/19                          | 310         | 60             | 11,686,000          |                                                                                                                              | adsorptive media: AD-33; pre-existing chlorine addition system & pH adjustment / control system upstream                                         | AdEdge Technologies             | 63                     | Operational issues with CO2 pH adjustment / control system                                                                                                                                                                                                         | 32.5                    | 31.4                 | 1.1            | 8.2       | 4.3              | 0.8        | 26.4        | <0.06    | 1.2                   | 23             | <25               | 0.4               | 7.9              | NA                | 32.7    | <0.05            | NA                   | NA                      | No backwash nor media replacement required during study period                                                                                                                            |                                                                                                                             |                                                                                                                                                                                                        |
| Valley Vista, AZ          | Arizona Water Company, Sedona | 2004/06/24 - 2004/10/25                          | 1520        | 36             | 2,058,000           | Run 1. One out of four wells was used in the study                                                                           | adsorptive media: FA-236-AS, AAFS50 media; pre-existing NaOCl addition                                                                           | Kinetico                        | 37                     | Effluent As concentrations varied with influent pH values. Relatively short run length. pH adjustment increased AAFS50's adsorptive capacity, tripling the media run length (Run 2). Intermittent system operation influenced media run length positively (Run 3). | 38.1                    | 37.8                 | 0.3            | 7.7       | NA               | NA         | 18.5        | <0.1     | NA                    | 8.7            | <30               | <0.1              | NA               | <0.1              | 15.7    | NA               | NA / 8240            | 20                      | 6 backwash cycles during study period                                                                                                                                                     | Spent media was disposed of in a non-hazardous waste landfill. Backwash wastewater was recycled.                            |                                                                                                                                                                                                        |
| Valley Vista, AZ          | Arizona Water Company, Sedona | 2004/10/25 - 2005/10/12                          | 1520        | 36             | 7,580,000           | Run 2 & 2a. One out of four wells was used in the study                                                                      | adsorptive media: FA-236-AS, AAFS50 media; pre-existing NaOCl addition; pH adjustment (H2SO4)                                                    | Kinetico                        | 37                     | Distribution system: As concentrations partially higher than those of the treatment effluent (8 - 27 µg/L) due to blending with untreated water.                                                                                                                   | 38.1                    | 37.8                 | 0.3            | 7.7       | NA               | NA         | 18.5        | <0.1     | NA                    | 8.7            | <30               | <0.1              | NA               | <0.1              | 15.7    | NA               | NA / 23,030          | 35                      | 10 backwash cycles during study period                                                                                                                                                    | Spent media was disposed of in a non-hazardous waste landfill. Backwash wastewater was recycled.                            |                                                                                                                                                                                                        |
| Valley Vista, AZ          | Arizona Water Company, Sedona | 2005/10/12 - 2006/03/07                          | 1520        | 36             | 3,411,000           | Run 3. One out of four wells was used in the study                                                                           | adsorptive media: FA-236-AS, AAFS50 media; pre-existing NaOCl addition. Intermittent run-time (16hr/d instead of 24hr/d), longer EBCT than Run 1 | Kinetico                        | 37                     |                                                                                                                                                                                                                                                                    | 38.1                    | 37.8                 | 0.3            | 7.7       | NA               | NA         | 18.5        | <0.1     | NA                    | 8.7            | <30               | <0.1              | NA               | <0.1              | 15.7    | NA               | NA / 10,360          | 37                      | 4 backwash cycles during study period                                                                                                                                                     | Spent media was disposed of in a non-hazardous waste landfill. Backwash wastewater was recycled.                            |                                                                                                                                                                                                        |
| Valley Vista, AZ          | Arizona Water Company, Sedona | 2006/03/07 - 2006/09/18                          | 1520        | 37             | 8,464,000           | Run 4. One out of four wells was used in the study                                                                           | adsorptive media: FA-236-AS, ARM200 media; pre-existing NaOCl addition                                                                           | Kinetico                        | 37                     | ARM200 media without pH adjustment: run length comparable to AAFS50 media with pH adjustment                                                                                                                                                                       | 38.1                    | 37.8                 | 0.3            | 7.7       | NA               | NA         | 18.5        | <0.1     | NA                    | 8.7            | <30               | <0.1              | NA               | <0.1              | 15.7    | NA               | NA / 25,720          | 23                      | 8 backwash cycles during study period                                                                                                                                                     | Spent media was disposed of in a non-hazardous waste landfill. Backwash wastewater was recycled.                            |                                                                                                                                                                                                        |
| Wales, ME                 | Spring Brook Mobile Home Park | 2005/03/07 - 2006/02/17                          | 14          | 11.2           | 927,916             | 14 mobile homes served                                                                                                       | adsorptive media: A/I Complex 2000; A/P Complex 2002 oxidative media                                                                             | Aquatic Treatment Systems (ATS) | 14                     | As levels > MCL after 3 months until media change after another 3 months. A/P Complex 2002 oxidative media showed a significant adsorptive capacity for As                                                                                                         | 38                      | 4.6                  | 33.4           | 8.6       | NA               | <0.7       | 10.7        | <0.06    | <0.04                 | 18             | <25               | 9.6               | 0.9              | 0.4               | 0.1     | <0.05            | 171,000 / 5100       | NA                      | run length per train (system = 2 trains); considering the three adsorption columns as one large column. The media were replaced after 5 to 6 months.                                      | Spent media could have been disposed of in a sanitary landfill (non-hazardous), but was recycled by the vendor              |                                                                                                                                                                                                        |

| Location      | Site name                                                                    | study period            | system size |                |                     |                                                                                                    | removal system                                                                                  |                                  |                        |                                                                                                                                                                                                              |                         | source water quality |                |           |                  |            |             |          |                       |                |                   |                   |                  |                   |                  | comment | performance      |                         |                                                                                                                                | Generation and handling of residuals                                                                        |                                                                             |
|---------------|------------------------------------------------------------------------------|-------------------------|-------------|----------------|---------------------|----------------------------------------------------------------------------------------------------|-------------------------------------------------------------------------------------------------|----------------------------------|------------------------|--------------------------------------------------------------------------------------------------------------------------------------------------------------------------------------------------------------|-------------------------|----------------------|----------------|-----------|------------------|------------|-------------|----------|-----------------------|----------------|-------------------|-------------------|------------------|-------------------|------------------|---------|------------------|-------------------------|--------------------------------------------------------------------------------------------------------------------------------|-------------------------------------------------------------------------------------------------------------|-----------------------------------------------------------------------------|
|               |                                                                              |                         | pop. served | av. flow [gpm] | vol. treated [gal.] | comment                                                                                            | type                                                                                            | vendor                           | design flow rate [gpm] | comment                                                                                                                                                                                                      | As total soluble [µg/L] | As(V) [µg/L]         | As(III) [µg/L] | pH (S.U.) | dissolved oxygen | TOC [mg/L] | SiO2 [mg/L] | P [mg/L] | Nitrate (as N) [mg/L] | Sulfate [mg/L] | Fe soluble [µg/L] | Mn soluble [µg/L] | U soluble [µg/L] | Sb soluble [µg/L] | V soluble [µg/L] |         | Ammonia          | run length [gal] / [BV] | backwash (regeneration) frequency [d]                                                                                          |                                                                                                             | comment                                                                     |
| Wales, ME     | Spring Brook Mobile Home Park                                                | 2006/09/08 - 2007/08/29 | 14          | 5.6            | 390,980             | 14 mobile homes served                                                                             | adsorptive media: Siemens GFH; Filox-R oxidative media                                          | Aquatic Treatment Systems (ATS)  | 7                      | Only 1 of 2 trains filled with GFH media. Filox-R media had no adsorptive capacity for As, but GFH shows 5 times the adsorptive capacity of A/I Complex 2000.                                                | 38                      | 4.6                  | 33.4           | 8.6       | NA               | <0.7       | 10.7        | <0.06    | <0.04                 | 18             | <25               | 9.6               | 0.9              | 0.4               | 0.1              | <0.05   | 391,000 / 11,600 | NA                      | Considering the three adsorption columns as one large column.                                                                  |                                                                                                             |                                                                             |
| Wales, ME     | Spring Brook Mobile Home Park                                                | 2006/09/08 - 2007/08/29 | 14          | 7.6            | 516,074             | 14 mobile homes served                                                                             | adsorptive media: Kimera CFH-12; Filox-R oxidative media                                        | Aquatic Treatment Systems (ATS)  | 7                      | Only 1 of 2 trains filled with CFH-12 media. Filox-R media had no adsorptive capacity for As, but CFH-12 shows 4 times the adsorptive capacity of A/I Complex 2000.                                          | 38                      | 4.6                  | 33.4           | 8.6       | NA               | <0.7       | 10.7        | <0.06    | <0.04                 | 18             | <25               | 9.6               | 0.9              | 0.4               | 0.1              | <0.05   | 516,000 / 15,300 | NA                      | Considering the three adsorption columns as one large column.                                                                  |                                                                                                             |                                                                             |
| Reno, NV      | South Truckee Meadows General Improvement District (STMGID) at Washoe County | 2005/09/27 - 2006/05/03 | 8300        | 275            | 15,567,000          | one out of five supply wells used for the study; treated water blended with water from other wells | adsorptive media: GFH; pre-existing prechlorination system                                      | Siemens                          | 350                    | Antimony breakthrough at 6µg/L at 3000 BV. Unexpectedly short run length for As probably due to competing anions (silica, phosphorus). Operational difficulties concerning backwash (involving SCADA & PLC). | 89.4                    | 89.1                 | 0.3            | 7.4       | NA               | <1         | 68.6        | <0.10    | NA                    | 8              | <30               | <0.1              | NA               | 15.8              | 3                | NA      | NA / 7200        | NA                      | Backwash was not required by the system, but has been done a few times for test purpose.                                       | Spent media disposed of at a sanitary landfill, backwash wastewater directly discharged to the sewer.       |                                                                             |
| Reno, NV      | South Truckee Meadows General Improvement District (STMGID) at Washoe County | 2007/04/05 - 2007/07/03 | 8300        | 276            | 18,848,000          | one out of five supply wells used for the study; treated water blended with water from other wells | adsorptive media: GFH (one vessel), CFH-0818 (two vessels); pre-existing prechlorination system | Siemens & Kemira Water Solutions | 350                    | Antimony breakthrough at 6µg/L at 1225 BV. Unexpectedly short run length for As probably due to competing anions (silica, phosphorus). Operational difficulties concerning backwash (involving SCADA & PLC). | 89.4                    | 89.1                 | 0.3            | 7.4       | NA               | <1         | 68.6        | <0.10    | NA                    | 8              | <30               | <0.1              | NA               | 15.8              | 3                | NA      | NA / 3700        | NA                      | Backwash was not required by the system, but has been done a few times for test purpose.                                       | Spent media disposed of at a sanitary landfill, backwash wastewater directly discharged to the sewer.       |                                                                             |
| Wellman, TX   | City of Wellman                                                              | 2006/08/10 - 2008/04/17 | 225         | 91             | 14,744,962          | 95 service connections                                                                             | adsorptive media: AD-33; pre-existing NaOCl addition system                                     | AdEdge Technologies              | 100                    | Av. flow: flow metres/totalizers recorded different results (118gpm on average with electromagnetic flow meter) -> master totalizer values used                                                              | 50.2                    | 38.4                 | 2.8            | 8.2       | 6.6              | 5.2        | 45.5        | <0.06    | 0.6                   | 240            | <25               | 0.4               | 10.1             | <0.1              | 151              | <0.05   | NA               | NA                      | Source water quality only from Well 1 (of 5). Only the nitrate level is higher (5.4) for the five wells combined & chlorinated | no As breakthrough during the study                                                                         | Neither backwash nor media replacement was required during the study period |
| Woodstock, CT | Woodstock Middle School                                                      | 2009/03/10 - 2010/09/30 | 510         | 16.4           | 544,600             | school                                                                                             | adsorptive media: Adsorbia GTO                                                                  | Dow Chemical Company             | 20                     |                                                                                                                                                                                                              | 20.9                    | 18                   | 3              | 7.7       | 0.6              | <1.0       | 14.3        | <0.02    | <0.05                 | 19.5           | <25               | 17.1              | NA               | <0.1              | 0.2              | <0.05   | 395,000 / 7600   | 7 - 77                  | Random backwash frequency (backwash timer not functioning correctly).                                                          | Backwash wastewater discharged to the sewer. No AM nor bag filter replacement required during study period. |                                                                             |

**Table S2.** Examples of websites (listed alphabetically) hosted by non-governmental organizations that provide aggregated information on technologies for drinking water treatment

| <b>name</b>                             | <b>type</b>                                                                                                | <b>Comments</b>                                                                                                                                                                           | <b>URL</b>                                                                              |
|-----------------------------------------|------------------------------------------------------------------------------------------------------------|-------------------------------------------------------------------------------------------------------------------------------------------------------------------------------------------|-----------------------------------------------------------------------------------------|
| aquaeXpert                              | Information platform hosted by the Swiss Gas and Water Industry Association                                | Competence center for questions on drinking water quality (French, German and Italian)                                                                                                    | <a href="http://aquaexpert.svgw.ch/">http://aquaexpert.svgw.ch/</a>                     |
| Blue Tech Research                      | Subsidiary of the consultancy O <sub>2</sub> Environmental                                                 | Global provider of water technology market intelligence                                                                                                                                   | <a href="http://www.bluetechresearch.com/">http://www.bluetechresearch.com/</a>         |
| Environmental XPRT                      | Subsidiary of the consultancy XPRT Media                                                                   | Global marketplace, industry marketplace and information resource                                                                                                                         | <a href="http://www.environmental-expert.com/">http://www.environmental-expert.com/</a> |
| Leaders Innovation Forum for Technology | Platform hosted by the Water Environment Research Foundation (WERF) and Water Environment Federation (WEF) | Intended to help bring new water technology to the field quickly and efficiently                                                                                                          | <a href="http://www.werf.org/lift">http://www.werf.org/lift</a>                         |
| The Water Network                       | Moderated peer-to-peer platform                                                                            | Online knowledge sharing platform and business exchange for global water professionals                                                                                                    | <a href="https://thewaternetwork.com/">https://thewaternetwork.com/</a>                 |
| Water Online                            | Online newsletter                                                                                          | Source of technical information and thought leadership for the drinking water and wastewater treatment communities                                                                        | <a href="http://www.wateronline.com/">http://www.wateronline.com/</a>                   |
| Water Research Foundation               | Membership organization                                                                                    | Hosts knowledge Portals (extensive, topic-specific resource areas that provide access to synthesized information and other key resources on top industry issues) available to subscribers | <a href="http://www.waterrf.org/">http://www.waterrf.org/</a>                           |
| Watershare®                             | Membership organization                                                                                    | Selected partner knowledge institutes from all over the world share in the use of expert water-related tools                                                                              | <a href="https://www.watershare.eu/">https://www.watershare.eu/</a>                     |
| WaterWorld                              | Online newsletter                                                                                          | Provides daily international business and industry-related news, current issue articles, and access to years of searchable editorial archives                                             | <a href="http://www.waterworld.com/">http://www.waterworld.com/</a>                     |
